# 1 **Auditory Hypersensitivity and Processing Deficits in a Rat**

## 2 **Model of Fragile X Syndrome**

3 Benjamin D. Auerbach<sup>1,2</sup>, Senthilvelan Manohar<sup>1</sup>, Kelly Radziwon<sup>1</sup>, and Richard Salvi<sup>1</sup>

4 <sup>1</sup> Center for Hearing and Deafness, University at Buffalo, Buffalo, NY 14214, USA

5 <sup>2</sup> Present Address: Department of Molecular & Integrative Physiology, Beckman Institute for  
6 Advanced Science & Technology, University of Illinois at Urbana-Champaign, Urbana, IL,  
7 61801, USA

8  
9 **Address correspondence to:** Benjamin D. Auerbach, Department of Molecular & Integrative  
10 Physiology, Beckman Institute for Advanced Science & Technology, University of Illinois at  
11 Urbana-Champaign, Urbana, IL, 61801, Email: [bda5@illinois.edu](mailto:bda5@illinois.edu)

### 12 **Abstract**

13 **Abstract**  
14 Fragile X (FX) syndrome is one of the leading inherited causes of autism spectrum disorder  
15 (ASD). A majority of FX and ASD patients exhibit sensory hypersensitivity, including auditory  
16 hypersensitivity or hyperacusis, a condition in which everyday sounds are perceived as much  
17 louder than normal. Auditory processing deficits in FX and ASD also afford the opportunity to  
18 develop objective and quantifiable outcome measures that are likely to translate between  
19 humans and animal models due to the well-conserved nature of the auditory system and well-  
20 developed behavioral read-outs of sound perception. Therefore, in this study we characterized  
21 auditory hypersensitivity in a *Fmr1* knockout (KO) transgenic rat model of FX using an operant  
22 conditioning task to assess sound detection thresholds and suprathreshold auditory reaction  
23 time-intensity (RT-I) functions, a reliable psychoacoustic measure of loudness growth, at a  
24 variety of stimulus frequencies, bandwidths and durations. Male *Fmr1* KO and littermate WT  
25 rats both learned the task at the same rate and exhibited normal hearing thresholds. However,  
26 *Fmr1* KO rats had faster auditory RTs over a broad range of intensities and steeper RT-I slopes  
27 than WT controls, perceptual evidence of excessive loudness growth in *Fmr1* KO rats.  
28 Furthermore, we found that *Fmr1* KO animals exhibited abnormal perceptual integration of  
29 sound duration and bandwidth, with diminished temporal but enhanced spectral integration of  
30 sound intensity. Because temporal and spectral integration of sound stimuli were altered in  
31 opposite directions in *Fmr1* KO rats, this suggests that abnormal RTs in these animals are  
32 evidence of aberrant auditory processing rather than generalized hyperactivity or altered motor

33 responses. Together, these results are indicative of fundamental changes to low-level auditory  
34 processing in *Fmr1* KO animals. Finally, we demonstrated that antagonism of metabotropic  
35 glutamate receptor 5 (mGlu5) selectively and dose-dependently restored normal loudness  
36 growth in *Fmr1* KO rats, suggesting a pharmacologic approach for alleviating sensory  
37 hypersensitivity associated with FX. This study leverages the tractable nature of the auditory  
38 system and the unique behavioral advantages of rats to provide important insights into the  
39 nature of a centrally important yet understudied aspect of FX and ASD.

40

41 **Keywords:** Autism spectrum disorder, fragile X, auditory hypersensitivity, hyperacusis,  
42 temporal integration, metabotropic glutamate receptor

#### 43 **List of abbreviations**

44 FX, fragile X; WT, wild type; KO, knockout, ASD, autism spectrum disorder; RT-I: reaction time-  
45 intensity

46

#### 47 **1. Introduction**

48 Human genetic studies have greatly increased our understanding of the gene mutations  
49 associated with the increased prevalence of autism spectrum disorders (ASD) (de la Torre-  
50 Ubieta et al., 2016; Doan et al., 2019). The results have facilitated the development of  
51 genetically validated animal models, which have been instrumental in the identification of the  
52 cellular and molecular disturbances linked with ASD (Moy and Nadler, 2008; Schroeder et al.,  
53 2017). Connecting molecular pathologies to behavioral phenotypes of ASD, however, remains  
54 a significant challenge that has impeded the development of ASD therapies (Berry-Kravis et al.,  
55 2018; Vorstman et al., 2017). A case in point is Fragile X syndrome (FX), the leading inherited  
56 cause of ASD (Hagerman et al., 2017). FX is caused by CGG expansions around the FMR1  
57 gene, leading to its transcriptional silencing and subsequent loss of its protein product FMRP  
58 (Verkerk et al., 1991). The known genetics of FX and the evolutionarily conserved nature of  
59 FMRP have allowed for the development of well-validated animal models of FX that have  
60 provided important insights into its pathophysiological mechanisms (Berry-Kravis, 2014; Krueger  
61 and Bear, 2011). For instance, animal studies have demonstrated that dysregulated  
62 metabotropic glutamate receptor 5 (mGlu5) signaling is a core component of FX  
63 pathophysiology and mGlu5 inhibitors have been successful at ameliorating many cellular,  
64 synaptic, and behavioral phenotypes in FX models (Bhakar et al., 2012; Michalon et al., 2012;  
65 Pop et al., 2014). Despite this preclinical success, clinical trials targeting molecular disturbances  
66 in FX have been largely disappointing to date (Anagnostou, 2018; Berry-Kravis et al., 2018).

67 Although many factors contribute to the challenges of clinical translation, one of most important  
68 gaps identified in pre-clinical animal studies is a lack of robust, clinically relevant behavioral  
69 phenotypes in animal models (Erickson et al., 2017). To address this gap, this study sought to  
70 develop a quantitative and disease-relevant behavioral read-out that could serve as a clinically  
71 translatable platform for screening potential therapies in FX models.

72 Sensory hypersensitivity and hyperreactivity are defining features of FX and ASD (Sinclair et  
73 al., 2017). One of the most common and debilitating sensory disturbances in FX and ASD is  
74 hyperacusis, an auditory hypersensitivity disorder in which moderate intensity sounds are  
75 perceived as unbearably loud (Danesh et al., 2015; Gomes et al., 2008; McCullagh et al., 2020;  
76 Rotschafer and Razak, 2014; Williams et al., 2021b). Loudness hyperacusis is not only an  
77 important clinical problem in FX and ASD, but may also provide a behavioral framework for the  
78 development of objective and quantifiable outcome measures that are likely to translate  
79 between humans and animal models due to the well-conserved nature of the auditory system  
80 and well-developed behavioral read-outs of sound perception. Operant sound detection tasks,  
81 where animals are trained to generate a behavioral response to specific stimuli, allow for  
82 detailed assessment of auditory detection speed and accuracy across a range of stimulus  
83 parameters using an experimental design that can be translated to human studies. Importantly,  
84 many of these psychoacoustic measures are also quantitative correlates for perceptual  
85 attributes of a stimulus. For instance, human and animal psychophysical studies have both  
86 shown that auditory reaction time (RT), the time it takes for a subject to respond to an acoustic  
87 stimulus, is inversely correlated with sound intensity. Reaction time-intensity (RT-I) functions  
88 collected in humans have been used to construct equal loudness contours that are well  
89 correlated with those obtained with subjective loudness scaling procedures (Marshall and  
90 Brandt, 1980; Melara and Marks, 1990; Seitz and Rakerd, 1997). RT-I functions collected in  
91 animals are predictably modulated by several acoustic parameters (frequency, duration,  
92 bandwidth) known to influence loudness judgements in humans (Green, 1975; May et al., 2009;  
93 Radziwon and Salvi, 2020; Stebbins, 1966). Thus, RT-I functions are an objective  
94 psychophysical read-out of loudness perception that is maintained across species. Indeed, RT-I  
95 functions have been used in several different animal models to quantify normal loudness growth  
96 (Stebbins, 1966), abnormal loudness growth due to cochlear hearing loss (Moody, 1973), and  
97 loudness hyperacusis resulting from salicylate ototoxicity or prolonged noise exposure  
98 (Auerbach et al., 2019; Radziwon et al., 2019; Radziwon et al., 2017).

99 Because auditory RT measures obey all the psychophysical rules of loudness perception  
100 with respect to intensity, frequency, stimulus bandwidth and duration, we used RT-I functions to

101 carry out a comprehensive assessment of loudness perception in a transgenic rat model of FX  
102 containing a 122 bp deletion in exon 8 of the *Fmr1* gene (*Fmr1* KO rat) (Hamilton et al., 2014).  
103 This model of FX recapitulates core cellular pathophysiology of the disorder, including altered  
104 mGlu5 function (Till et al., 2015), but takes advantage of the highly trainable nature of rats to  
105 allow for in depth behavioral characterization not afforded by other model systems (Golden et  
106 al., 2019). Using RT-I measures, we found that male *Fmr1* KO rats exhibit increased loudness  
107 perception and disrupted spectral and temporal integration of loudness compared to WT  
108 controls, indicative of heightened sound sensitivity and disrupted auditory processing. Finally,  
109 we determined that normal RTs could be restored in *Fmr1* KO rats by inhibiting mGlu5 activity,  
110 demonstrating that this behavioral phenotype is related to a core molecular pathology of FX.  
111 Together, these results indicate that auditory RT differences may be a novel behavioral  
112 phenotype in FX that is directly related to core sensory disturbances in the disorder and can be  
113 used for preclinical screening of treatments.

114

## 115 **2. Methods:**

116 **2.1 Subjects.** Adult (>2 month old) male *Fmr1*<sup>tm1sage</sup> KO rats on an outbred Sprague-Dawley  
117 background (TGRS5390HTM4 FMR1 -/Y; SAGE Labs Inc., St. Louis, MO) and littermate wild-  
118 type (WT) controls were used for these studies. Male rats were used because FX occurs more  
119 frequently and in greater severity in males due to the X-linked nature of the disorder (Reiss and  
120 Hall, 2007). Nine *Fmr1* KO rats and nine WT littermates were used were used as subjects in  
121 most studies, except as noted. Rats were housed in pairs and maintained on a 12 h day/12  
122 night cycle. The rats used in the experiments had free access to food and water except during  
123 operant conditioning, when rats were food restricted and kept at approximately 90% of their  
124 free-feeding weight. Rats in the operant conditioning studies were tested approximately 1 hr per  
125 day, 6-7 days per week. All experiments were approved by the University at Buffalo Institutional  
126 Animal Care and Use Committee (HER05080Y) in accordance with NIH guidelines.

127 **2.2 Breeding and Genotyping:** WT male rats (Charles River) were bred to heterozygous  
128 female *Fmr1* KO rats to generate male WT and *Fmr1* KO offspring used in these studies.  
129 Offspring were screened for a 122-base pair (bp) deletion in the *Fmr1* gene sequence using  
130 published procedures (Hamilton et al., 2014). Using a commercial kit (QIAGEN DNeasy  
131 isolation kit #69506), DNA was isolated from a tissue punch taken from the external ear. PCR  
132 was performed with a commercial kit (Sigma JumpStart™ Taq ReadyMix™, P2893) and 1-μL of  
133 purified DNA. The PCR amplification steps were: first cycle, 5 min at 95 °C; 35 cycles of 30-s  
134 each at 95 °C; 30-s at 60 °C; 40-s at 68 °C and a final cycle of 5-min at 68 °C. Primers used for

135 amplification were S1 (5' TGGCATAGACCTTCAGTAGCC 3') and S2 (5'  
136 TATTTGCTTCTCTGAGGGGG 3'). Primers were purchased from ThermoFisher Scientific.  
137 Amplified fragments were resolved in 2% agarose gel. The expected amplicon sizes on the gels  
138 were 400-bp for WT rats (+/+ or +/-), two products of 400-bp and 278-bp for heterozygotes (+/-)  
139 and 278-bp for homozygotes (-/- or -/y).

140 **2.3 Operant psychophysical procedures:** Rats were trained on a Go/No-go operant  
141 conditioning paradigm to detect sound bursts (5 ms rise/fall time, cosine gated) of varying  
142 intensity, frequency, duration, and bandwidth as described in our recent papers (Auerbach et  
143 al., 2019; Radziwon et al., 2019; Radziwon et al., 2017; Radziwon and Salvi, 2020). A rat  
144 started a trial by placing its nose in a nose-poke hole, which initiated a variable wait interval  
145 ranging from 1 to 4 s. The rat had to maintain its position in the nose-poke hole until it detected  
146 a sound or the trial was aborted (Fig. 1A). If the rat detected the signal and removed its nose  
147 from the nose-poke hole (Go condition) within a 2-s response interval, a food reward (45 mg  
148 dustless rodent pellets, Bio-Serv) was delivered and the response was scored as a HIT. A MISS  
149 was recorded if the rat failed to remove its nose from the nose-poke within the 2-s response  
150 interval. Approximately 30% of the trials were catch trials during which no stimulus was  
151 presented (No-go condition). If the rat kept its nose in the nose-poke during a catch trial, a  
152 correct rejection (CR) was recorded; no reinforcement was given for a CR, but another trial  
153 could be initiated immediately. If the rat removed its nose during a catch trial, a False Alarm  
154 (FA) was recorded and the rat received a 4-s timeout during which the house light was turned  
155 off and no trial could be initiated. Testing was carried out in a sound-attenuating chamber.  
156 Stimuli were calibrated using a sound level meter (Larson-Davis System 824) equipped with a  
157 half-inch microphone (Larson-Davis model 2520) at a location where the animal's head would  
158 be during a trial.

159 Rats were initially trained to detect 60 dB SPL broadband noise (BBN, 1-42 kHz) bursts.  
160 Criteria for training was > 200 trials initiated, > 90% hit rate, and <15% false alarm rate over 5  
161 consecutive days. Following training, sound intensity was varied using the Method of Constant  
162 Stimuli (MOCS); within each 10-trial block, seven target intensities were presented randomly  
163 along with three catch trials. To measure thresholds, noise bursts and tone bursts were  
164 presented at intensities from -5 to 45 dB SPL in 5 dB steps. Mean HIT and FA rates were used  
165 to calculate the sensitivity index  $d'$  for each intensity and noise or tone burst detection  
166 thresholds were estimated using a conservative  $d'$  value of 1.5 (Radziwon et al., 2019;  
167 Radziwon et al., 2009; Steckler, 2001). RT-I functions were collected for noise and tone bursts  
168 presented at intensities from 10-90 or 30-90 dB SPL in 10 dB steps. RT, defined as the time

169 from sound stimulus onset to the time the rat removed its nose from the nose-poke hole, was  
170 assessed only for correct HIT trials (Fig 1A). To test for temporal integration of loudness,  
171 thresholds and RT-I functions were evaluated for BBN bursts of 50, 100, and 300 ms duration.  
172 To test for spectral integration of loudness, thresholds and RT-I functions were evaluated for 16  
173 kHz tone and narrow band noise (NBN) bursts (300 ms) with nominal bandwidths of 1/3 octave  
174 (14.1 – 17.8 kHz), 1 octave (11.3 – 22.8 kHz), or 2 octaves (8 – 32 kHz). To test for frequency  
175 effects, thresholds and RT-I functions were evaluated for tone bursts (300 ms) at 4, 8, 16, 32  
176 kHz. At least 600 trials (200 trials on 3 consecutive days of testing) were used to estimate each  
177 quiet threshold and loudness growth RT-I function in KO and WT rats.

178 **2.4 MTEP Treatment:** MTEP (Cayman Chemical, #14961), an mGlu5 receptor negative  
179 allosteric modulator, was dissolved in saline at 10 mg/ml. MTEP was administered  
180 intraperitoneal (i.p.) at 1 mg/kg, 3 mg/kg or 10 mg/kg, doses shown to be behaviorally effective  
181 while maintaining receptor specificity (Pilc et al., 2002; Spooren et al., 2000). Baseline RT-I  
182 functions for BBN (50 ms) were measured for 1-week in *Fmr1* KO and WT rats and then MTEP  
183 (1, 3 or 10 mg/kg) or saline was administered acutely 30 minutes before behavioral testing.  
184 Animals received each dose of MTEP or saline in pseudorandomized order while allowing for  
185 >1-week washout between treatments. Animals continued to be tested daily for RT-I functions  
186 between treatments. The selection of MTEP doses and timing of injections were based on the  
187 known half-life of MTEP in the brain (Anderson et al., 2002) and previous studies demonstrating  
188 this dosing regimen to be behaviorally effective (Spooren et al., 2000; Varty et al., 2005).

189

### 190 **3 Results**

191 **3.1 *Fmr1* KO and WT rats exhibit similar learning and performance on an operant**  
192 **sound detection task:** Male *Fmr1* KO (n=9) and WT (n=9) rats were trained to detect  
193 broadband noise bursts (BBN, 1-42 kHz, 50 ms, 5 ms rise/fall) using a Go/No-go operant  
194 conditioning paradigm (Fig. 1A). Correct Go responses were recorded as a HIT, failure to  
195 respond on Go trials were counted as a MISS, correct No-go responses were considered a  
196 Correct Rejection (CR), and incorrect Go responses on catch trials were recorded as a False  
197 Alarm (FA) (Fig 1A). During training, the mean (+/-SEM) number of trials increased over the first  
198 15 training days and then plateaued in both genotypes and there was no significant difference  
199 between *Fmr1* KO and WT rats in terms of the number of trials initiated (Fig 1B). Two-way  
200 repeated measure ANOVA found a significant effect of training days on number of trials initiated  
201 ( $F_{19, 304} = 87.14$ ,  $***p < 0.0001$ ) but no significant effect of genotype ( $F_{1, 304} < 0.0001$ ,  $p =$   
202 0.9994). There was also no significant difference between WT and KO rats in terms of percent

203 of trials scored as HIT or percent scored as FA trials (Fig 1C). Two-way repeated measure  
 204 ANOVA found a significant effect of training days on percent HIT ( $F_{19,304} = 3.274$ ,  $***p < 0.0001$ )  
 205 and percent FA ( $F_{14, 120} = 3.070$ ,  $**p = 0.0012$ ) but no significant effect of genotype on percent  
 206 HIT ( $F_{1, 304} = 1.607$ ,  $p = 0.2058$ ) or percent FA ( $F_{1, 120} = 1.540$ ,  $p = 0.2170$ ). *Fmr1* KO and WT  
 207 rats did not differ significantly on the number of days to reach the training criteria either (WT:  
 208 13.67 +/- 0.69 days; KO: 14.11 +/- 1.23; two-tailed t-test,  $t_{16} = 0.3614$ ,  $p = 0.7225$ ) (Fig 1D).  
 209 Thus, WT and *Fmr1* KO rats learned the Go/No-go operant task at the same rate and to the  
 210 same criteria. While FX individuals can often display differences in learning, motivation and  
 211 impulsivity (Chromik et al., 2019; Schmitt et al., 2019), these results suggest that there are no  
 212 genotype differences in these non-auditory factors in this sound detection task.  
 213

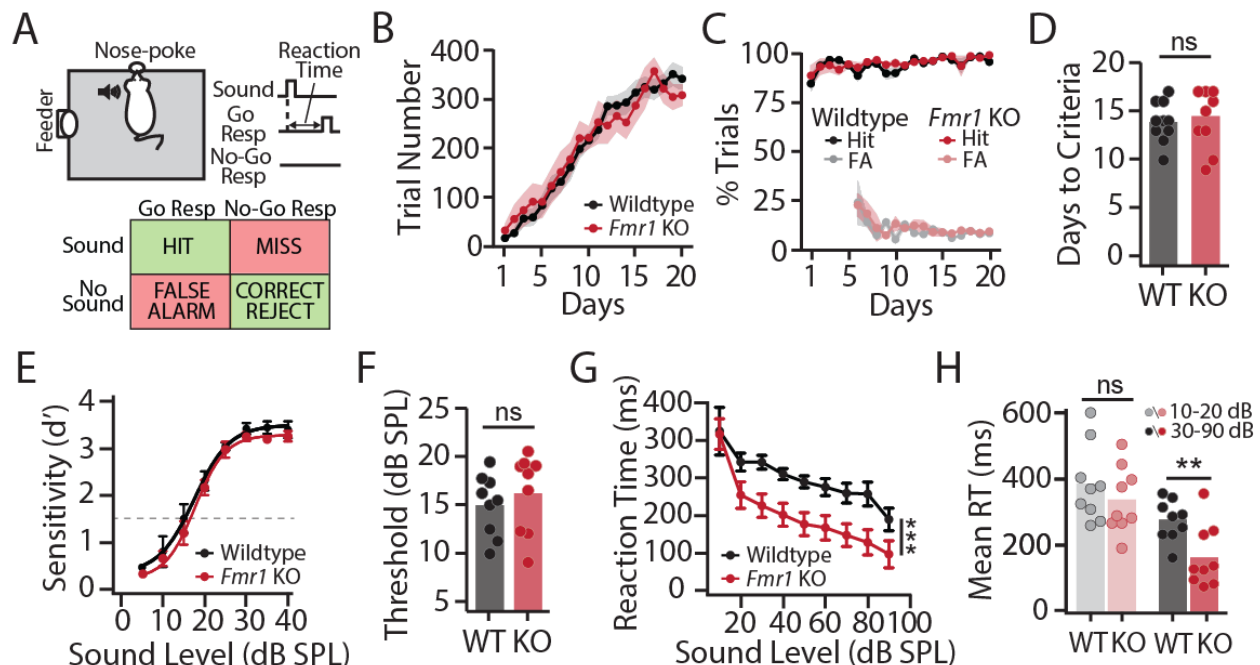

215 **Figure 1: Psychoacoustic assessment of sound detection thresholds and**  
 216 **suprathreshold auditory reaction times in male *Fmr1* KO and WT littermate rats.**  
 217 **(A)** Schematic of operant sound detection apparatus and paradigm. Food-restricted rats  
 218 were trained to detect broadband noise (BBN) bursts using a Go/No-go paradigm. **(B)**  
 219 *Fmr1* KO rats (red, n = 9) and littermate WT rats (black, n = 9) initiated the same number of  
 220 trials over training days. **(C)** WT and KO rats generated the same percentage of HITs  
 221 and FAs over training days. **(D)** WT and KO rats learned the task to the criteria (>200  
 222 trials/session, >90% correct, <15% FA, 5-consecutive days) over the same number of  
 223 days. **(E)** Psychometric functions showing mean  $d'$ -prime values versus intensity for  
 224 trained *Fmr1* KO and WT rats in response to broadband noise bursts (BBN; 1-42 kHz,  
 225 50 ms, 0-40 dB SPL, 5 dB steps). **(F)** No differences in hearing thresholds between KO  
 226 and WT rats estimated using a criterion of  $d' = 1.5$  (dashed line in E). **(G)** Reaction time

227 (RT)-intensity functions collected for BBN bursts (1-42 kHz, 50 ms, 10-90 dB SPL, 10 dB  
228 steps). RTs were significantly faster in *Fmr1* KO animals ( $***p < 0.0001$ ). **(H)** Mean RTs  
229 at two lowest intensities (10-20 dB SPL) and five highest intensities (30-90 dB SPL) in  
230 WT and *Fmr1* KO rats. RTs in WT and KO rats are similar at low intensities, but  
231 significantly faster in KO rats at high intensities ( $**p < 0.001$ ). For this and subsequent  
232 figures, data is plotted as mean  $\pm$  SEM. Bar graphs represent mean data with overlaid  
233 scatter plots of data from each individual animal.

234 **3.2 *Fmr1* KO rats have normal sound detection thresholds:** To determine sound  
235 detection sensitivity in *Fmr1* KO and WT rats, BBN bursts (50 ms) were presented at near  
236 threshold intensities (5-45 dB, 5 dB steps) using the method of constant stimuli (MOC)  
237 (Radziwon et al., 2009). HIT and FA rates from over 600 trials (200 trials/day for 3 consecutive  
238 days) were used to determine d-prime ( $d'$ ), a standard metric of sensitivity from signal detection  
239 theory (Steckler, 2001). Psychometric curves for *Fmr1* KO ( $n=9$ ) and WT ( $n=9$ ) rats were  
240 constructed by plotting  $d'$  (mean $\pm$ SEM) as a function of sound intensity (Fig 1E).  $d'$  increased  
241 with sound intensity in both genotypes, indicating that as sounds grew louder they were more  
242 readily detectable, and psychometric functions from *Fmr1* KO and WT rats largely overlapped  
243 with no genotype differences in  $d'$  across intensities (Fig. 1E). Two-way repeated measure  
244 ANOVA found a significant effect of intensity on  $d'$  ( $F_{7, 105} = 52.64$ ,  $***p < 0.0001$ ), but no  
245 significant effect of genotype ( $F_{1, 105} = 0.5783$ ,  $p = 0.4487$ ). There was no significant difference  
246 in BBN thresholds between *Fmr1* KO and WT rat using a conservative threshold criterion of  $d' =$   
247 1.5 (WT: 14.96  $\pm$  1.062 dB SPL; KO: 16.21  $\pm$  1.364 dB SPL; two-tailed t-test,  $t_{16} = 0.7234$ ,  $p$   
248 = 0.4799). These results indicate that *Fmr1* KO rats have comparable performance on a sound  
249 detection task to WT animals and normal hearing thresholds.

250 **3.3 *Fmr1* KO rats exhibit excessive loudness growth:**  $d'$  is a sensitive measure of near  
251 threshold sound detection but saturates rapidly above threshold (Fig 1E). This metric therefore  
252 does not adequately convey suprathreshold loudness perception, which may be most affected  
253 in individuals with FX and ASD (Danesh et al., 2015; Gomes et al., 2008; Williams et al.,  
254 2021b). Because RT-I functions provide a valid measure loudness growth in humans and  
255 animals (Lauer and Dooling, 2007; Marshall and Brandt, 1980; May et al., 2009), auditory RTs  
256 were measured in response to BBN bursts (50 ms) from near threshold to suprathreshold sound  
257 intensities (10-90 dB SPL, 10 dB steps) in the same group of animals to determine if *Fmr1* KO  
258 rats showed signs of exaggerated loudness growth. Mean ( $\pm$ SEM) RTs values at 10 dB SPL,  
259 near the threshold of detectability, were approximately 400 ms for both *Fmr1* KO ( $n=9$ ) and WT  
260 ( $n=9$ ) rats (Fig 1G). RTs became progressively faster with increasing intensity in both  
261 genotypes; however, the decrease in RT was much greater for *Fmr1* KO rats (Fig 1G) and RTs



262 were significantly shorter in *Fmr1* KO rats compared to WT rats (Fig 1H). Two-way repeated  
263 measure ANOVA found a significant effect of intensity on RTs ( $F_{8,144} = 12.201$ ,  $***p < 0.0001$ )  
264 and a significant effect of genotype ( $F_{1,144} = 40.968$ ,  $***p < 0.0001$ ), but there was no significant  
265 interaction effect ( $F_{8,144} = 0.607$ ,  $p = 0.771$ ). To visualize the RT differences between WT and  
266 KO at low versus high intensities, mean RTs were computed from 10-20 dB SPL and 30-90 dB  
267 SPL for the two genotypes (Fig. 1H). The mean RTs of WT and *Fmr1* KO rats at near threshold  
268 intensities, 10-20 dB SPL, were not significantly different (WT: 384.0 +/- 38.63 ms; KO: 335.8  
269 +/- 33.72 ms; two-tailed t-test,  $t_{16} = 0.9407$ ,  $p = 0.3609$ ). However, at intensities from 30-90 dB  
270 SPL, the mean RTs of *Fmr1* KO rats were significantly faster than WT rats (WT: 275.0 +/- 20.51  
271 ms; KO: 163.8 +/- 31.30 ms; two-tailed test,  $t_{36} = 2.971$ ,  $**p = 0.009$ ). Taken together, these  
272 results indicate that RT grows more rapidly at suprathreshold intensities in *Fmr1* KO rats than  
273 WT rats, suggestive of increased loudness growth.

274 **3.4 Disrupted temporal integration of loudness in *Fmr1* KO rats:** Loudness perception  
275 not only depends on sound intensity but also duration, with the perceived loudness of a sound  
276 increasing with stimulus duration out to approximately 300 ms after which it remains constant  
277 (Buus et al., 1997; Florentine et al., 1998; Pedersen and Poulsen, 1973; Radziwon and Salvi,  
278 2020). To determine if temporal integration of loudness was disrupted in *Fmr1* KO rats, RT-I  
279 functions were measured using BBN bursts of 50, 100 and 300 ms duration. In WT rats (n=9),  
280 mean (+/-SEM) RTs became significantly faster with increasing duration but maintained similar  
281 intensity-dependent changes, leading to RT-I functions that were roughly parallel but stacked  
282 above one another (Fig. 2A). RTs were fastest for 300 ms BBN bursts, slowest for 50 ms  
283 bursts, and intermediate for 100 ms bursts. Two-way repeated measure ANOVA found that  
284 RTs in WT rats became significantly faster with both intensity ( $F_{6,112} = 3.91$ ,  $**p = 0.003$ ) and  
285 duration ( $F_{2,112} = 80.55$ ,  $***p < 0.0001$ ), consistent with previous reports of temporal integration  
286 of loudness in normal rats (Radziwon and Salvi, 2020). RTs in *Fmr1* KO rats also decreased as  
287 intensity increased (Fig. 2B); however, there was no effect of sound duration on RTs in KO  
288 animals as the RT-I functions obtained with 50, 100 and 300 ms BBN bursts overlapped one  
289 another (Fig. 2B). Two-way repeated measure ANOVA found a significant effect of intensity on  
290 RT in *Fmr1* KO rats ( $F_{6,112} = 3.07$ ,  $*p < 0.011$ ) but not duration ( $F_{2,112} = 2.95$ ,  $p = 0.057$ ).  
291 Importantly, there was little evidence of temporal integration of loudness in *Fmr1* KO rats even  
292 at low intensities where there is ample room for RTs to become faster with increasing duration.  
293 The lack of temporal integration is not due to a “floor” effect because RTs clearly became faster  
294 in *Fmr1* KO rats at higher sound intensities.

295  
296  
297  
298  
299  
300  
301  
302  
303  
304  
305  
306  
307  
308  
309  
310  
311  
312  
313  
314

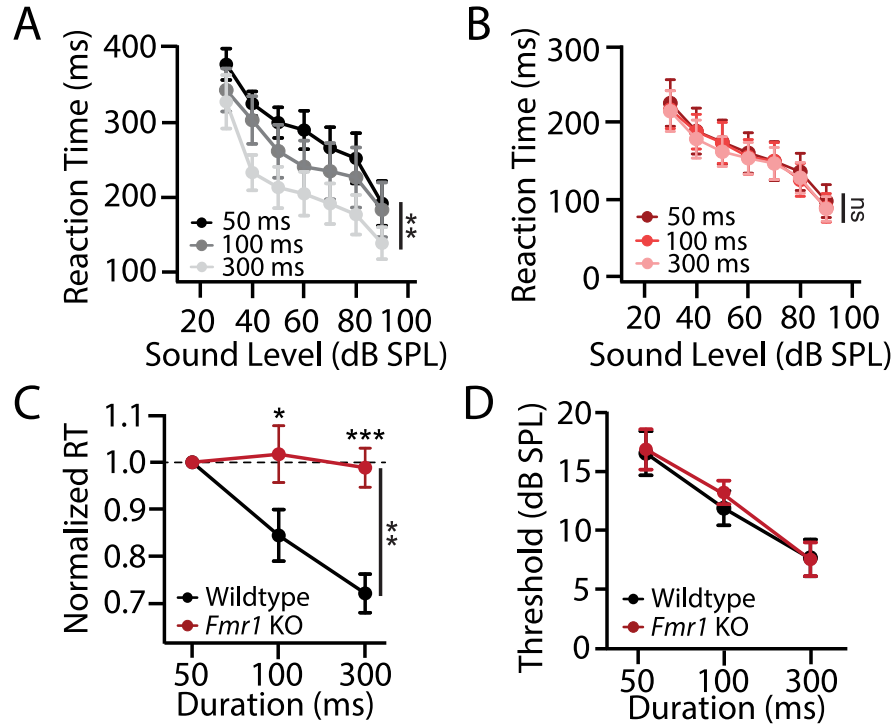

315 **Figure 2: Disrupted temporal integration of loudness in *Fmr1* KO rats.** Auditory reaction  
316 time-intensity (RT-I) functions measured with broadband noise bursts (BBN) of 50, 100 and  
317 300 ms duration in (A) WT (+/- SEM, n=9) rats and (B) littermate *Fmr1* KO (+/-SEM, n = 9)  
318 rats. In WT rats, RTs decreased significantly with intensity (\*\* $p < 0.0025$ ) and duration (\*\* $p <$   
319  $0.001$ ) whereas in *Fmr1* KO rats, RTs only decreased significantly with intensity (\* $p <$   
320  $0.0114$ ), but not duration ( $p = 0.057$ ). (C) Mean RTs across intensities (30-90 dB SPL) in  
321 WT and KO rats as a function of BBN duration, normalized to mean RTs for 50 ms BBN.  
322 RTs in WT rats were modulated by duration to significantly greater extent than *Fmr1* KO rats  
323 at 100 ms (\*\* $p < 0.01$ ) and 300 ms (\*\* $p < 0.001$ ). (D) Threshold of audibility (defined at  $d' =$   
324  $1.5$ ) plotted as function of BBN duration. Thresholds decreased with duration in both *Fmr1*  
325 KO and WT rats and there was no significant difference in BBN thresholds across  
326 genotypes at any duration.

327

328 To quantify the relative effect of sound duration on RT across genotypes, normalized RTs  
329 were computed by dividing the average RT across intensities (30-90 dB) measured with 50, 100  
330 ms and 300 ms BBN bursts by the average RT across intensities (30-90 dB) obtained with 50  
331 ms BBN bursts for each rat. In the WT animals, mean (+/-SEM) normalized RT declined from  
332 1.0 at 50 ms to approximately 0.7 at 300 ms, indicating that RTs at 300 ms were approximately  
333 30% faster than at 50 ms (Fig. 2C). In *Fmr1* KO rats, mean normalized RTs were essentially  
334 unchanged from 50 ms (1.0) to 300 ms (0.99). Two-way ANOVA found a significant effect of  
335 duration ( $F_{2, 32} = 9.765$ , \*\*\* $p < 0.0001$ ), a significant effect of genotype ( $F_{1, 32} = 11.27$ , \*\* $p =$

336 0.0037), and a significant interaction between genotype and duration ( $F_{2,32} = 8.503$ ,  $**p = 0.001$ )  
337 on normalized RTs. Bonferroni post-hoc analysis found that duration has significantly more  
338 impact on average RT in WT animals compared to *Fmr1* KO rats at 100 ms ( $*p < 0.05$ ) and 300  
339 ms ( $***p < 0.0001$ ). Thus, the lack of temporal integration of loudness in *Fmr1* KO rats indicates  
340 that faster RTs in *Fmr1* KO likely reflects a genuine perceptual disruption rather than effects due  
341 to non-auditory factors such as motivation or motor differences.

342 Temporal integration also affects the threshold of audibility. Hearing thresholds typically  
343 decrease 8-15 dB as stimulus duration increases out to approximately 300 ms, after which it  
344 remains constant (Pedersen and Salomon, 1977). To test for genotype differences in temporal  
345 integration at the threshold of audibility, sound detection thresholds were measured in WT and  
346 *Fmr1* KO rats using 50, 100 and 300 ms BBN bursts from 0-40 dB SPL. Mean (+/- SEM)  
347 thresholds in KO rats (n=9) were similar to those of WT rats (n=8) at 50, 100 and 300 ms (Fig.  
348 2D). As duration increased from 50 to 300 ms, thresholds decreased from 16.9 +/- 1.87 dB SPL  
349 to 8.05 +/- 1.56 dB SPL in WT rats and 17.24 +/- 1.71 dB SPL to 7.93 +/- 1.42 dB SPL in KO  
350 rats. Two-way repeated measure ANOVA found that duration has a significant effect on  
351 thresholds ( $F_{2,30} = 47$ ,  $***p < 0.0001$ ); however, there was no significant effect of genotype ( $F_{1,30}$   
352 = 0.077,  $p = 0.785$ ) and no significant interaction between genotype and duration ( $F_{2,30} = 0.31$ ,  $p$   
353 = 0.735).

354 **3.6 Enhanced spectral integration of loudness in KO rats:** Loudness not only varies  
355 with intensity and duration, but also stimulus bandwidth (Cacace and Margolis, 1985; Scharf  
356 and Meiselman, 1977; Yost and Shofner, 2009; Zwicker et al., 1957). Loudness remains  
357 constant when the total energy of the stimulus lies within the critical band, but loudness  
358 increases as energy spreads outside the critical band. To test for spectral integration of  
359 loudness, RT-I functions were measured with 16 kHz tone bursts and 1/3, 1 and 2 octave-wide  
360 NBN bursts (300 ms) centered around 16 kHz. Mean (+/-SEM) RTs of WT rats (n = 8)  
361 decreased with intensity; however, the characteristics of the RT-I function were bandwidth  
362 dependent (Fig. 3A). The RT-I functions for 16 kHz and the 1/3 octave NBN were nearly  
363 identical indicating that these two stimuli were perceived as equally loud. However, as  
364 bandwidth increased further RTs became faster, indicative of spectral integration of loudness.  
365 Two-way repeated measure ANOVA revealed a significant effect of sound intensity ( $F_{4,84} =$   
366 34.114,  $***p < 0.0001$ ) and bandwidth ( $F_{3,84} = 4.324$ ,  $*p = 0.016$ ) on RT in WT animals. There  
367 was also a significant interaction between bandwidth and intensity ( $F_{12,84} = 2.345$ ,  $*p = 0.012$ ).  
368 To elucidate the interaction of bandwidth and intensity in WT rats, the mean RTs were plotted  
369 as a function of bandwidth at each intensity (Fig. 3B). RTs for 16 kHz tones (a nominal

370 bandwidth of 1 Hz), 1/3 octave, and 1 octave wide NBN were not significantly different from one  
 371 another. The only significant differences in RTs occurred at 30 and 40 dB SPL for the largest  
 372 bandwidth separation (1 Hz vs 2 octave) (Bonferroni post-hoc,  $*p < 0.05$ ).  
 373

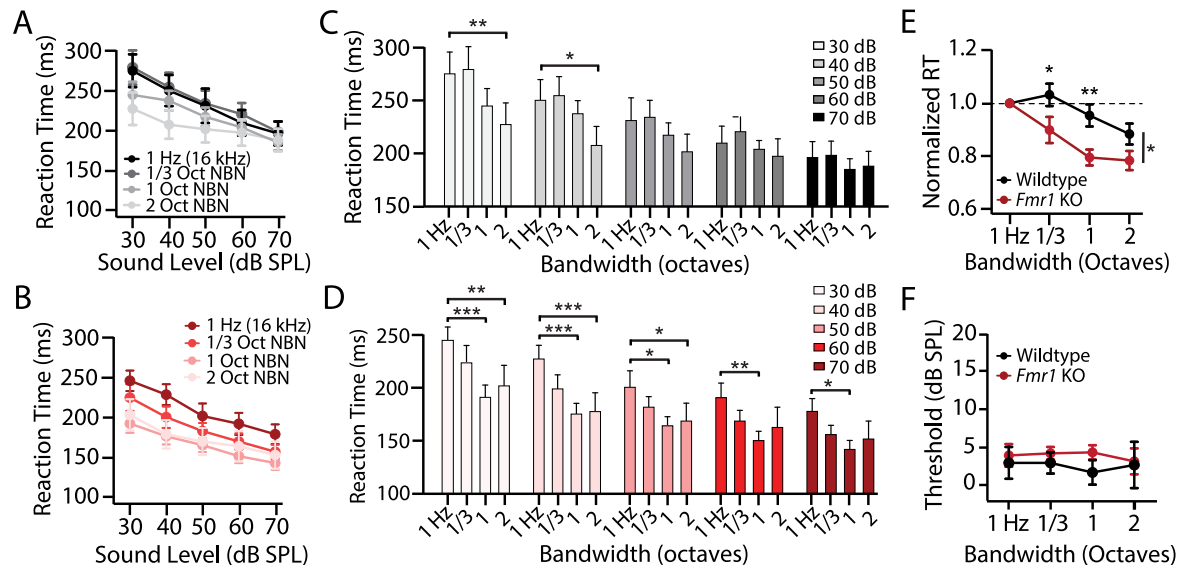

375 **Figure 3: Altered spectral integration of loudness in *Fmr1* KO rats. (A-B)** Mean (+/-SEM)  
 376 reaction time-intensity (RT-I) functions in WT (n=8) and littermate *Fmr1* KO (n = 8) rats.  
 377 Stimuli were 300 ms tone bursts (16 kHz, 1 Hz nominal bandwidth) and 300 ms narrow band  
 378 noise (NBN) bursts centered at 16 kHz with bandwidths of 1/3, 1, or 2 octaves (Oct) from 30  
 379 to 70 dB SPL in 10 dB steps. **(A)** Mean (+/-SEM) RT-I functions in WT animals. RTs  
 380 decreased significantly with intensity ( $***p < 0.0001$ ) and bandwidth ( $*p = 0.016$ ) and there  
 381 was a significant bandwidth-intensity interaction ( $*p = 0.012$ ). **(B)** Mean (+/-SEM) RT-I  
 382 functions in *Fmr1* KO animals. RTs decreased significantly with intensity ( $***p < 0.0001$ ) and  
 383 bandwidth ( $**p = 0.004$ ) and the interaction between bandwidth and intensity not significant.  
 384 **(C)** Mean RTs (+SEM) at each bandwidth (1 Hz, 1/3, 1, and 2 Oct) and each intensity (30-70  
 385 dB SPL) in WT animals. RTs at 1 Hz (16 kHz) were significantly slower from 2 Oct NBN at  
 386 30 and 40 dB SPL only ( $*p < 0.05$ ). **(D)** Mean (+SEM) RTs at each bandwidth (1 Hz, 1/3, 1,  
 387 and 2 Oct) and each intensity (30-70 dB SPL) in *Fmr1* KO animals. Significant differences  
 388 in RT between 1 Hz (16 kHz) and 1 and/or 2 Oct NBN at all intensities ( $*p < 0.05$ ,  $**p < 0.01$ ,  
 389  $***p < 0.001$ ). **(E)** Mean RTs from 30-70 dB SPL in WT and KO rats as a function of  
 390 bandwidth, normalized to 1 Hz. The effect of bandwidth on RTs was significantly greater for  
 391 *Fmr1* KO verse WT animals for 1/3 ( $*p < 0.05$ ) and 1 ( $**p < 0.01$ ) octave band noise. **(F)**  
 392 Mean (+/-SEM) thresholds as a function of bandwidth in *Fmr1* KO and WT rats. Thresholds  
 393 (defined at  $d' = 1.5$ ) were not affected by bandwidth and there was no significant difference in  
 394 thresholds across genotypes at any bandwidth.

395 In *Fmr1* KO rats (n=8), the mean (+/-SEM) RTs also became faster with increasing intensity and  
 396 bandwidth; however, the effects of bandwidth on RT-I functions in KO animals were distinct from

397 WT controls (Fig. 3C). While RT-I functions for two the two largest bandwidths (1 and 2  
398 octaves) largely overlapped in KO animals, the functions were shifted upward from 1 Hz and 1/3  
399 octave wide NBN (Fig. 3C). Two-way repeated measure ANOVA found a significant effect of  
400 sound intensity ( $F_{4,84} = 68.174$ ,  $***p < 0.0001$ ) and bandwidth ( $F_{3,84} = 6.155$ ,  $**p = 0.004$ ) in  
401 *Fmr1* KO rats, but there was no significant interaction between bandwidth and intensity ( $F_{12,84} =$   
402  $1.767$ ,  $p=0.067$ ). To visualize the effect of bandwidth, mean RTs were plotted as function of  
403 bandwidth from 30 to 70 dB SPL (Fig. 3C-D). At all intensities, there was a significant decrease  
404 in RT between 1 Hz (16 kHz tone) and 1/3 and/or 1.0 octave wide NBN (Bonferroni post-hoc,  $*p$   
405  $< 0.05$ ).

406 To quantify the relative effect of bandwidth across genotypes, the mean RT (30-70 dB SPL)  
407 at each bandwidth was normalized to the mean RT at 1 Hz (i.e., 16 kHz). Mean normalized RTs  
408 are plotted as function of bandwidth for WT and *Fmr1* KO rats in Fig. 3E. While RTs generally  
409 became faster with increasing bandwidth in both genotypes, RTs in *Fmr1* KO animals were  
410 more sensitive to smaller bandwidth changes. Two-way repeated measures ANOVA found a  
411 significant effect of bandwidth ( $F_{3,42} = 14.24$ ,  $***p < 0.0001$ ) and genotype ( $F_{1,42} = 8.222$ ,  $*p =$   
412  $0.0124$ ) on normalized RT and there was a significant interaction between bandwidth and  
413 genotype ( $F_{3,42} = 2.879$ ,  $*p = 0.047$ ). Post-hoc analysis demonstrated that RTs were  
414 significantly faster in *Fmr1* KO animals at 1/3 (Bonferroni post-hoc,  $*p < 0.05$ ) and 1 (Bonferroni  
415 post-hoc,  $**p < 0.01$ ) octave NBN compared to WT littermates. These results show there is a  
416 much greater decrease in RT with increasing bandwidth in KO rats than WT rats and the decline  
417 occurs at narrower bandwidth, evidence of greater spectral integration of loudness in *Fmr1* KO  
418 rats.

419 **3.7 No spectral integration at threshold:** To test for genotype differences in spectral  
420 integration at the threshold of audibility, behavioral detection thresholds in quiet were  
421 determined for 300 ms tone burst at 16 kHz and the three NBN bandwidths. The mean  
422 thresholds ( $\pm$ -SEM,  $n=8$ ) in *Fmr1* KO and WT rats were not significantly different from one  
423 another (Fig. 3F). Two-way repeated measure ANOVA found no significant effect of genotype  
424 ( $F_{1,42} = 0.441$ ,  $p = 0.517$ ) or bandwidths ( $F_{3,42} = 0.144$ ,  $p = 0.933$ ) on detection thresholds and  
425 no interaction between the factors ( $F_{3,42} = 0.299$ ,  $p = 0.826$ ). Thus, WT and *Fmr1* KO rats have  
426 similar thresholds and there was no difference in spectral integration at the threshold of  
427 audibility.

428 **3.8 Loudness growth at different sound frequencies in WT and KO rats.** To identify  
429 potential frequency-dependent differences in loudness growth between KO ( $n=9$ ) and WT ( $n=8$ )  
430 rats, RT-I functions were evaluated at 4, 8, 16 and 32 kHz (Marshall and Brandt, 1980;

431 Radziwon and Salvi, 2020). The mean (+/-SEM) RT-I functions assessed with 300 ms tone  
 432 bursts decreased with intensity for both genotypes, but the RT-I functions for *Fmr1* KO rats were  
 433 consistently below and roughly parallel to RT-I functions of WT rats at all frequencies (Fig. 4A-  
 434 D). Two-way repeated measure ANOVAs found significant effects of intensity and genotype on  
 435 RT-I functions at all frequencies, respectively (4 kHz:  $F_{6, 105} = 17.89$ ,  $***p < 0.0001$ ;  $F_{1, 105} =$   
 436  $22.21$ ,  $***p < 0.0001$ ; 8 kHz:  $F_{6, 105} = 14.74$ ,  $***p < 0.001$ ;  $F_{1, 105} = 23.84$ ,  $***p < 0.0001$ ; 16 kHz:  
 437  $F_{6, 105} = 7.68$ ,  $***p < 0.0001$ ;  $F_{1, 105} = 10.92$ ,  $**p = 0.0013$ ; 32 kHz:  $F_{6, 105} = 4.52$ ,  $**p = 0.0004$ ;  $F_{1,$   
 438  $105 = 14.47$ ,  $**p = 0.0002$ ). There were no significant interactions between intensity and  
 439 genotype at any frequency.  
 440

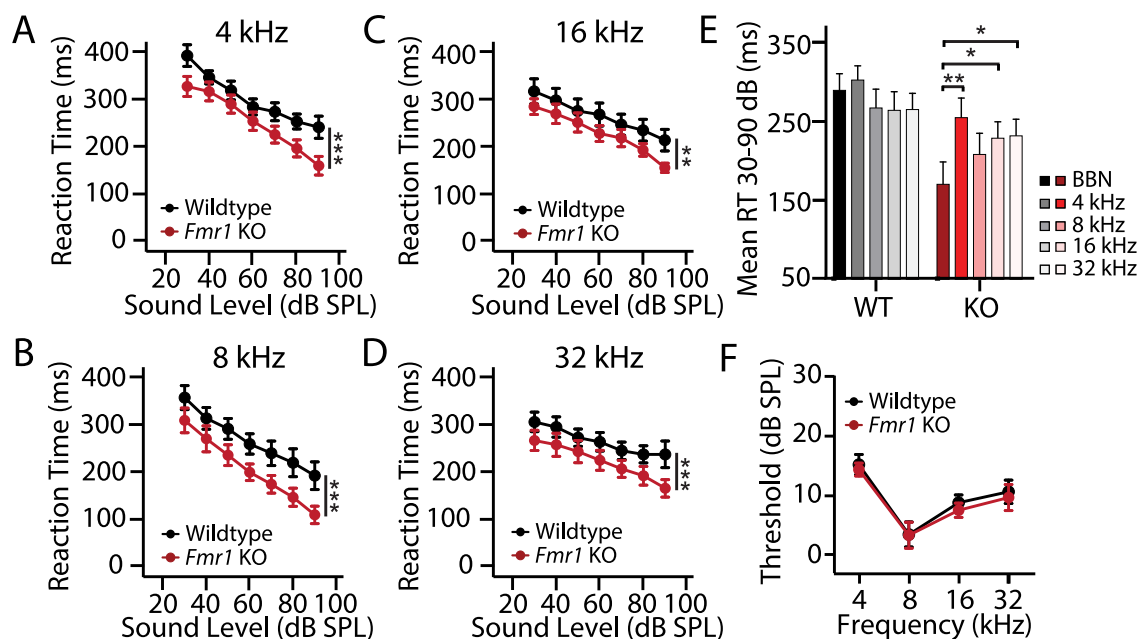

442 **Figure 4: Loudness growth at different frequencies in WT and *Fmr1* KO rats. (A-D)** Mean  
 443 (+/-SEM) reaction time-intensity function in WT (n = 8) and KO (n = 9) rats obtained with 300  
 444 ms tone bursts at (A) 4 kHz, (B) 8 kHz, (C) 16 kHz and (D) 32 kHz. In both genotypes, RTs  
 445 varied significantly as a function of sound intensity for all frequencies ( $***p < 0.0001$ ). RTs  
 446 were significantly faster in *Fmr1* KO rats than WT rats at 4 kHz ( $***p < 0.0001$ ), 8 kHz ( $***p <$   
 447  $0.0001$ ), 16 kHz ( $**p = 0.0013$ ) and 32 kHz ( $***p = 0.0002$ ). (E) Mean RTs across  
 448 intensities (30-90 dB SPL) in response to BBN bursts (300 ms) and 4, 8, 16 and 32 kHz tone  
 449 bursts (300 ms) in *Fmr1* KO and WT rats. Among WT rats, mean RT for BBN was not  
 450 significantly different from mean RT for 4, 8, 16 or 32 kHz. Among *Fmr1* KO rats, mean RT  
 451 for BBN was significantly faster than mean RTs at 4 ( $**p < 0.01$ ), 16 ( $*p < 0.05$ ) and 32 kHz  
 452 ( $*p < 0.05$ ). (F) Mean (+/-SEM) thresholds at 4, 8, 16 and 32 kHz for WT and *Fmr1* KO rats.  
 453 Mean thresholds varied significantly with frequency ( $***p < 0.0001$ ), but thresholds not  
 454 significantly across genotypes at any frequency.

455 To determine if RTs to BBN bursts differed from tone bursts across genotype, mean RTs in  
456 WT rats (n=8) and KO rats (n=9) were computed from 30 to 90 dB SPL for BBN bursts (300 ms)  
457 and 4, 8, 16 and 32 kHz tone bursts (300 ms) (Fig. 4E). Mean RTs were significantly slower in  
458 WT rats than *Fmr1* KO rats across all stimulus conditions (BBN and 4 frequencies), as a two-  
459 way repeated measures ANOVA found a significant effect of genotype ( $F_{1,64} = 5.54$ ,  $*p =$   
460  $0.0318$ ). However, the effect of stimulus condition ( $F_{4,64} = 2.18$ ,  $p = 0.081$ ) and interaction of  
461 stimulus condition and genotype ( $F_{4,64} = 1.97$ ,  $p = 0.109$ ) were not significant. Post-hoc  
462 analysis showed that the mean RTs for BBN bursts and 4, 8, 16 and 32 kHz tone bursts did not  
463 differ significantly from one another in WT rats. However, in *Fmr1* KO rats, the mean RT for  
464 BBN was significantly faster than the mean RTs at 4, 16 and 32 kHz tone bursts (Bonferroni  
465 post-hoc,  $**p < 0.01$ ,  $*p < 0.05$ ). These results suggest that loudness growth is altered across a  
466 broad range of sound frequencies in *Fmr1* KO rats and provide further evidence for greater  
467 spectral integration of loudness in these animals.

468 **3.9 No differences in tone detection thresholds between *Fmr1* KO and WT rats:** To  
469 determine if *Fmr1* KO and WT rats have similar pure tone sensitivity, thresholds were assessed  
470 at 4, 8, 16 and 32 kHz using tone bursts (300 ms). Mean (+/-SEM) thresholds for *Fmr1* KO  
471 (n=9) and WT (n=8) were lowest at 8 kHz and increased slightly at higher and lower  
472 frequencies. There was a significant main effect of frequency ( $F_{3,58} = 13.51$ ,  $p < 0.0001$ ), but the  
473 thresholds for *Fmr1* KO and WT rats were not significantly different ( $F_{1,58} = 0.41$ ,  $p = 0.527$ ) and  
474 the interaction between genotype and frequency was not significant ( $F_{3,58} = 0.04$ ,  $p = 0.99$ ).  
475 These results indicate that pure tone hearing thresholds are similar in *Fmr1* KO and WT rats.

476 **3.10 mGlu5 inhibition selectively slows RTs in *Fmr1* KO but not WT rats:** We next sought  
477 to determine if we could reverse auditory RT differences in *Fmr1* KO animals through  
478 pharmacological manipulation. Because dysregulated mGlu5 signaling is a core component of  
479 FX pathophysiology (Bhakar et al., 2012; Michalon et al., 2012; Pop et al., 2014), we  
480 determined if mGlu5 inhibition could restore normal loudness perception in *Fmr1* KO rats.  
481 Following baseline measurements, RT-I functions in response to 50 ms BBN bursts were  
482 measured in WT and *Fmr1* KO rats treated with the specific mGlu5 negative allosteric modulator  
483 MTEP at three doses (1, 3 and 10 mg/kg, i.p.) or saline 30 minutes prior to behavioral testing.  
484 RT-I functions in MTEP treated WT rats (+/-SEM, n=10) were nearly identical to those obtained  
485 at baseline or after control treatment with saline at all doses tested (Fig. 5A). Two-way repeated  
486 measure ANOVA did reveal a significant effect of treatment ( $F_{4,216} = 5.54$ ,  $*p = 0.025$ ) in addition to  
487 intensity ( $F_{6,252} = 26.243$ ,  $**p = 0.001$ ). However, post-hoc analysis determined that there was  
488 no significant difference between RT-I functions obtained following MTEP treatment at any dose

489 compared to baseline or saline control conditions (Bonferroni post hoc,  $p > 0.05$ ). There was a  
 490 much clearer effect of MTEP treatment on *Fmr1* KO rats ( $n = 12$ ), as MTEP dose-dependently  
 491 upshifted RT-I functions in these animals. Two-way repeated measure ANOVA revealed a  
 492 significant effect of intensity ( $F_{6, 288} = 62.114$ ,  $***p < 0.0001$ ) and treatment ( $F_{4, 288} = 13.399$ ,  $***p$   
 493  $< 0.0001$ ). Moreover, post-hoc analysis revealed that RTs at nearly every intensity were  
 494 significantly slower in *Fmr1* KO rats following the 3 or 10 mg/kg dose of MTEP relative to  
 495 baseline and saline control conditions (Bonferroni post-hoc,  $*p < 0.05$ ,  $**p < 0.001$ ,  $***p <$   
 496  $0.0001$ ).

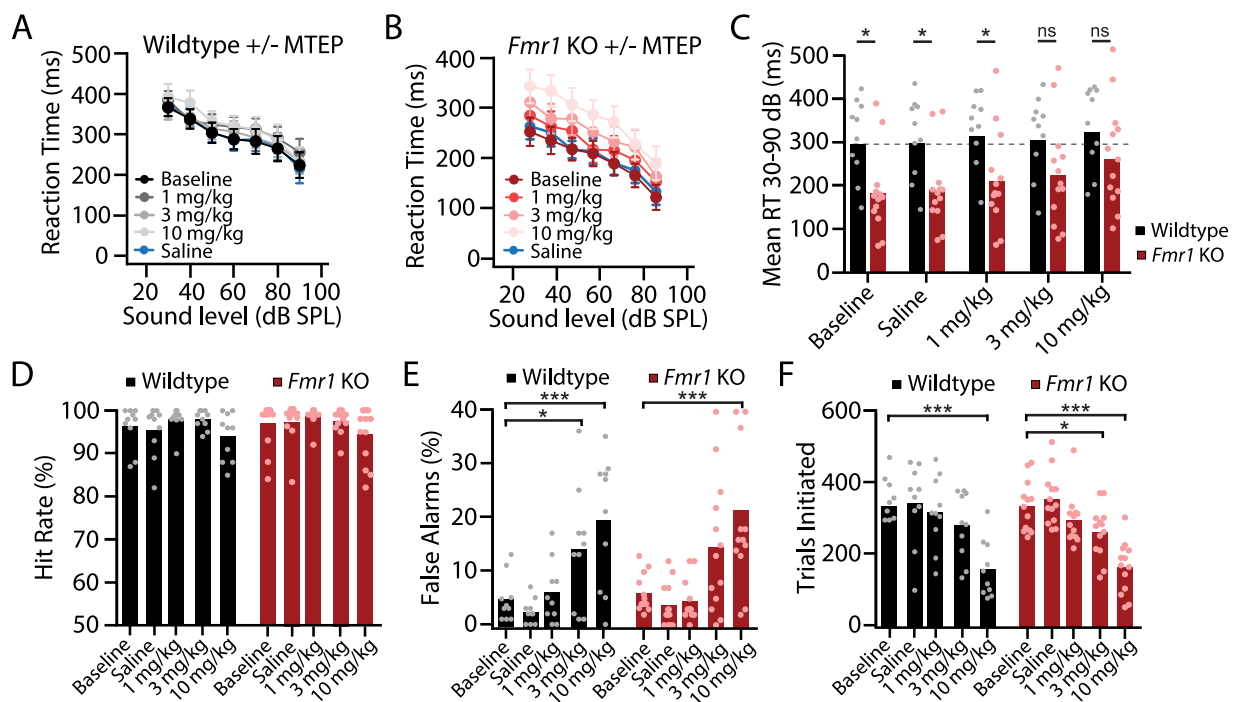

499 **Figure 5: Inhibition of mGlu5 dose-dependently increases RTs in *Fmr1* KO but not WT**  
 500 **rats. (A)** Mean (+/-SEM,  $n = 10$ ) reaction time-intensity (RT-I) functions from WT rats  
 501 treated with different doses of the selective mGlu5 negative allosteric modulator MTEP or  
 502 saline versus baseline control. Analysis of the RT-I functions revealed a significant effect of  
 503 intensity ( $***p < 0.0001$ ) and treatment ( $*p < 0.025$ ); however, RTs obtained with MTEP  
 504 treatments were not significantly different from baseline or saline control conditions. **(B)**  
 505 Mean (+/-SEM,  $n = 12$ ) RT-I functions from *Fmr1* KO rats treated with different doses of  
 506 MTEP or saline versus baseline control. Analysis of the RT-I functions revealed a significant  
 507 effect of intensity ( $***p < 0.0001$ ) and treatment ( $***p < 0.0001$ ) and RT-I functions were  
 508 significantly different from baseline and saline control conditions when treated with 3 mg/kg  
 509 ( $**p = 0.004$ ) or 10 mg/kg ( $***p < 0.001$ ) MTEP. **(C)** Mean RTs from 30 to 90 dB SPL in WT  
 510 and *Fmr1* KO rats for baseline, saline, and 1, 3 and 10 mg/kg MTEP conditions. RTs were  
 511 significantly faster in *Fmr1* KO rats compared WT rats for the baseline, saline control and 1  
 512 mg/kg MTEP conditions ( $*p < 0.05$ ). Mean values for WT and *Fmr1* KO rats were not



513 significantly different from one another for the 3 and 10 mg/kg MTEP treatments ( $p > 0.05$ ).  
514 **(D)** Mean percent correct responses did not differ across experimental conditions in WT ( $p =$   
515  $0.107$ ) or *Fmr1* KO rats ( $p = 0.102$ ). **(E)** Mean percent false alarms in WT rats and *Fmr1* KO  
516 rats varied significantly across treatment ( $***p < 0.0001$ ) but there was no significant effect of  
517 genotype ( $p = 0.703$ ). False alarm rates were significantly greater with 3 mg/kg ( $*p < 0.05$ )  
518 and 10 mg/kg ( $***p < 0.001$ ) MTEP treatment in WT animals and were significantly greater in  
519 KO animals at 10 mg/kg MTEP treatment ( $***p < 0.001$ ) compared to baseline. **(F)** Mean  
520 trials initiated in WT rats and *Fmr1* KO rats varied significantly across treatment ( $***p <$   
521  $0.0001$ ) but there was no significant effect of genotype ( $p = 0.8496$ ). Trial number was  
522 significantly decreased with 10 mg/kg ( $***p < 0.001$ ) MTEP treatment in WT animals and  
523 was significantly decreased in KO animals with 3 mg/kg ( $*p < 0.05$ ) and 10 mg/kg ( $***p <$   
524  $0.001$ ) MTEP treatment compared to baseline. Bar graphs represent mean data with  
525 overlaid scatter plots of data from each individual animal.

526 To assess genotype differences with MTEP treatment, average RTs were computed for  
527 intensities between 30 and 90 dB SPL and the mean values compared across genotype for  
528 baseline, saline, 1, 3 and 10 mg/kg MTEP (Fig. 5C). The average RTs in WT rats were relatively  
529 constant across treatments. In contrast, RTs in *Fmr1* KO rats dose-dependently increased with  
530 MTEP dose so that there was no significant difference in average RT between WT and KO rats  
531 treated with 3 or 10 mg/kg MTEP. Two-way repeated measure ANOVA revealed a significant  
532 effect of genotype ( $F_{1, 84} = 6.64$ ,  $*p < 0.018$ ), treatment ( $F_{4, 84} = 13.51$ ,  $***p < 0.0001$ ) and a  
533 significant genotype x treatment interaction ( $F_{4, 84} = 3.98$ ,  $**p = 0.0052$ ). The average RTs were  
534 significantly faster in *Fmr1* KO rats for the baseline, saline control, and 1 mg/kg MTEP  
535 conditions (Bonferroni post-hoc,  $*p < 0.05$ ). However, the mean values for WT and *Fmr1* KO  
536 rats were not significantly different from one another for the 3 and 10 mg/kg MTEP treatments,  
537 suggestive of normal loudness restoration in *Fmr1* KO rats (Bonferroni post-hoc,  $p > 0.05$ ).

538 To test for non-specific drug effects, mean percent HIT, mean percent FA and mean number  
539 of trials were examined for WT and *Fmr1* KO rats for all experimental conditions. Mean HIT  
540 rates in WT rats (Fig. 5D, left panel) and *Fmr1* KO rats (Fig. 5D, right panel) did not differ across  
541 experimental conditions in either WT (one-way repeated measure ANOVA;  $F_{4, 36} = 2.060$ ,  $p =$   
542  $0.1065$ ) or *Fmr1* KO rats (one-way repeated measure ANOVA;  $F_{4, 48} = 2.050$ ,  $p = 0.1022$ ).  
543 However, FA rates dose-dependently increased in both WT (one-way repeated measures  
544 ANOVA;  $F_{4, 36} = 12.44$ ,  $***p < 0.0001$ ) and *Fmr1* KO (one-way repeated measures ANOVA;  $F_{4,$   
545  $36 = 11.07$ ,  $***p < 0.0001$ ) (Fig 5E). In both genotypes, FA rate was significantly higher following  
546 3 mg/kg and 10 mg/kg MTEP conditions than in the baseline and/or saline control conditions  
547 (Bonferroni post hoc  $*p < 0.05$ ,  $**p < 0.001$ ,  $***p < 0.0001$ ). Mean number of trials per session  
548 also decreased at higher doses of MTEP in both WT (one-way repeated measures ANOVA;  $F_{4,$

549  $_{36} = 12.04$ ,  $***p < 0.0001$ ) and *Fmr1* KO rats (one-way repeated measures ANOVA;  $F_{4, 48} =$   
550  $24.64$ ,  $***p < 0.0001$ ) (Fig 5F). Both WT and *Fmr1* KO animals initiated significantly less trials  
551 following 10 mg/kg MTEP compared to baseline and saline control treatment (Bonferroni post  
552 hoc  $*p < 0.05$ ,  $**p < 0.001$ ,  $***p < 0.0001$ ). While MTEP treatment affected trial initiation and FA  
553 rate equally in WT and KO animals, RTs were only affected in *Fmr1* KO rats, suggesting that  
554 the reversal of RT difference was not due to non-specific drug effects. While these results  
555 indicate that mGlu5 inhibition can reverse loudness disturbances in *Fmr1* KO rats, they also  
556 suggest that this treatment is associated with dose-limiting side effects that affected both  
557 genotypes equally.

#### 558 **4 Discussion:**

559 Here we used a perceptual decision-making task to perform a detailed characterization of  
560 sound intensity processing and loudness perception in a *Fmr1* KO rat model of FX. *Fmr1* KO  
561 animals learned the Go/No-go sound detection task at the same rate as WT counterparts and  
562 reached similar peak performance (Fig 1A-F). Despite similar sound detection levels, *Fmr1* KO  
563 rats responded with significantly faster RTs to stimuli across a wide-range of intensities,  
564 indicative of loudness hyperacusis (Fig 1G-H). To gain insights into the nature of this perceptual  
565 disturbance, we evaluated how auditory thresholds and suprathreshold RT-intensity functions  
566 were affected by sound duration, frequency and stimulus bandwidth in *Fmr1* KO and WT  
567 littermates. *Fmr1* KO animals exhibited impaired temporal integration of loudness when  
568 stimulus duration was increased (Fig 2), but enhanced spectral integration of loudness as  
569 bandwidth increased (Fig 3, 4). Importantly, we demonstrated that loudness hyperacusis in  
570 *Fmr1* KO rats could be normalized by mGlu5 antagonism, demonstrating that this auditory  
571 perceptual phenotype is related to a core molecular pathology of the disorder (Fig 5). However,  
572 the doses of MTEP that normalized loudness perception in *Fmr1* KO rats also had mild effects  
573 on task performance in both WT and KO rats, indicating the potential for dose-limited side  
574 effects of broad-spectrum mGlu5 inhibitors. Our results provide the first detailed behavioral  
575 characterization of a debilitating auditory phenotype (loudness hyperacusis) in an animal model  
576 of FX. These quantitative and clinically translatable behavioral assays provide researchers with  
577 a powerful experimental tool that can be used to identify effective therapies to treat one of the  
578 major sensory disabilities associated with FX and ASD.

579 **4.1 Abnormal loudness perception in FX and ASD:** Decreased sound tolerance is a  
580 common feature of FX and ASD, with prevalence rates between 75 and 85% (Williams et al.,  
581 2021b). The specific perceptual attributes underlying these sound tolerance disturbances

582 remain unclear, as they could reflect disruptions to low-level sound processing, an altered ability  
583 to gate sensory input, and/or aberrant emotional responses to auditory stimuli (Williams et al.,  
584 2021a). While recent EEG studies in FX individuals and *Fmr1* KO mice have found  
585 neurophysiological evidence for low-level sound processing deficits, including increased  
586 magnitude of sound-evoked responses (Ethridge et al., 2016; Lovelace et al., 2018), auditory  
587 perceptual deficits in FX have not been well-characterized. Here, we found that auditory RTs  
588 decreased with intensity in both *Fmr1* KO and WT rats, but that RTs were consistently faster in  
589 *Fmr1* KO rats than WT littermates. The relationship between RT and intensity have been well  
590 documented in psychoacoustic studies (Lauer and Dooling, 2007; Marshall and Brandt, 1980;  
591 May et al., 2009) with RT-I functions being tightly correlated with loudness growth functions  
592 (Marshall and Brandt, 1980; Schlittenlacher et al., 2014; Wagner et al., 2004). These results  
593 therefore suggest that suprathreshold sounds are perceived as louder in *Fmr1* KO rats  
594 compared to WT littermates, indicative of loudness hyperacusis (Lauer and Dooling, 2007; Tyler  
595 et al., 2014). Because RTs in *Fmr1* KO and WT rats did not differ at low-intensities near  
596 threshold, faster RTs in *Fmr1* KO at suprathreshold intensities likely reflect aberrant loudness  
597 processing rather than motor differences. This interpretation is further supported by the fact that  
598 *Fmr1* KO rats exhibited altered temporal and spectral integration of sound intensity. If RT  
599 differences were due to non-auditory factors, then it would be expected that RTs in *Fmr1*  
600 animals would be modulated by changes to sound duration and bandwidth in a similar manner  
601 to their WT counterparts, but this was clearly not the case (Fig 2,3). Because the perceptual  
602 integration of sound duration and bandwidth were altered in opposite directions in *Fmr1* KO rats,  
603 this suggests that abnormal RTs in these animals are evidence of aberrant auditory processing  
604 rather than generalized hyperactivity or altered motor responses. These findings are consistent  
605 with previous studies showing lower loudness discomfort levels and steeper loudness growth  
606 functions among individuals with ASD (Demopoulos and Lewine, 2016; Khalfa et al., 2004;  
607 Rosenhall et al., 1999; Steigner and Ruhlman, 2014). Thus, sound tolerance issues in FX may be  
608 due in part to increased loudness perception.

609 **4.2 Aberrant temporal and spectral integration of loudness:** Loudness increases with  
610 stimulus duration out to ~300 ms (Zwislocki, 1969). In WT rats, temporal integration of loudness  
611 was expressed as a systematic decrease in RT from 50 to 300 ms (Fig 2A), consistent with  
612 previous results (Radziwon and Salvi, 2020). RTs in *Fmr1* KO rats, however, exhibited minimal  
613 RT changes as stimulus duration increased (Fig 2B). Thus, loudness processing is not only  
614 disrupted in the intensity domain, but also in the temporal domain. However, temporal  
615 integration was clearly present at low intensities near the threshold of audibility in *Fmr1* KO rats

616 (Fig 2D), suggesting that the mechanisms responsible for temporal integration near threshold  
617 are different from those mediating temporal summation of loudness. Consistent with this notion,  
618 in humans with cochlear hearing loss, temporal summation of loudness remains relatively  
619 normal (Buus et al., 1999; Pedersen and Poulsen, 1973) whereas temporal integration at the  
620 threshold is significantly reduced (Hall and Fernandes, 1983; Plack and Skeels, 2007).

621 Loudness remains constant as long as the energy in the stimulus is within the critical band,  
622 but increases at wider bandwidths (Scharf, 1978; Zwicker et al., 1957). In WT rats, RTs  
623 became faster for bandwidths  $\geq 1$  octave suggesting a critical bandwidth between 1/3 to 1  
624 octave (Fig. 3E). A significant decrease in RTs was already evident at 1/3 octave in *Fmr1* KO  
625 rats signifying that the critical bandwidth was  $\leq 1/3$  octave in these animals (Fig 3E). Because  
626 the critical band is narrower in *Fmr1* KO rats than WT rats, BBN would be perceived as louder in  
627 *Fmr1* rats. This would also explain why RTs are so much faster for BBN than for tone bursts in  
628 *Fmr1* rats (Fig 4E). The difference between *Fmr1* KO and WT rats for spectral integration of  
629 loudness is unlikely due to cochlear dysfunction because *Fmr1* KO rats have normal hearing  
630 thresholds and because cochlear hearing loss leads to a broadening of the critical band rather  
631 than a narrowing (Zwicker et al., 1957). Thus, enhanced spectral integration and diminished  
632 temporal summation of loudness in *Fmr1* rats are likely to be central rather than cochlear in  
633 origin, potentially due to imbalances in the magnitude, timing and spectral integration of  
634 excitatory and inhibitory inputs to central auditory neurons (Isaacson and Scanziani, 2011; Wehr  
635 and Zador, 2003). These rudimentary perceptual changes are not only clinically-relevant  
636 phenotypes that can be used to uncover potentially generalizable pathophysiological  
637 mechanisms and treatment strategies for FX, but they are also likely to be directly related to  
638 more complex phenotypes in FX and ASD, such as impaired language processing and  
639 communication. More detailed psychophysical studies should be conducted to determine if the  
640 novel disturbances in temporal and spectral integration observed in *Fmr1* KO rats occur in  
641 humans with FX and ASD.

642 **4.3 Using RT-I functions as a drug-discovery and clinical outcome measure:** FX has  
643 been a bellwether for illustrating the potential and pitfalls of translating pre-clinical findings into  
644 treatments for neurodevelopmental disorders (Berry-Kravis et al., 2017; Leigh et al., 2013;  
645 Nickols and Conn, 2014). Despite tremendous insight into the pathophysiological mechanisms  
646 of FX from animal models, clinical trials targeting identified molecular disturbances in FX have  
647 been disappointing to date (Berry-Kravis et al., 2018). For instance, the mGluR theory of FX has  
648 been the most influential model for understanding FX pathophysiology (Bear et al., 2004),  
649 positing that loss of FMRP leads to exaggerated protein synthesis linked of mGlu5 activation,

650 resulting in altered synaptic function that is the root cause of cognitive impairment in FX (Bear et  
651 al., 2008; Bhakar et al., 2012). Decreasing mGlu5 activity has indeed been successful at  
652 reversing numerous phenotypes in animal models of FX (Dolen et al., 2007; Michalon et al.,  
653 2012). Despite this preclinical success, recent large-scale clinical trials targeting this receptor  
654 have largely failed (Berry-Kravis et al., 2016). Some of these clinical translation difficulties are  
655 due to the fact that broad-spectrum mGlu5 antagonists are associated with dose-limiting side  
656 effects and drug-dependent tolerance (Berry-Kravis et al., 2018; Erickson et al., 2017). A better  
657 understanding of how mGlu5 couples to FMRP-regulated protein synthesis might circumvent  
658 some of these issues by allowing for the development of pharmacotherapies that specially  
659 target signaling cascades thought to be involved in FX pathogenesis while leaving other side-  
660 effect producing signaling arms unaffected (McCamphill et al., 2020; Stoppel et al., 2017).  
661 Another key factor complicating the translation of apparently effective therapies in animal  
662 models into the clinic is that many animal phenotypes do not have equivalent correlates in  
663 humans, limiting their translational value (Berry-Kravis et al., 2018). The RT-I functions used in  
664 our study to assess loudness growth and hyperacusis have been carefully validated in human  
665 psychophysical studies (Lauer and Dooling, 2007; Marshall and Brandt, 1980). RT-I functions  
666 may thus provide researcher with a relatively simple, quantitative, and robust behavioral read-  
667 out for investigating auditory processing deficits in FX, which is a common and clinically  
668 important sensory phenotype that affects up to 85% of individuals with FX and ASD (Danesh et  
669 al., 2015; McCullagh et al., 2020; Williams et al., 2021b). Preclinical pharmacological studies in  
670 *Fmr1* KO rats can be used to carry out dose-response studies with prospective therapeutic  
671 compounds to test their effectiveness in reversing loudness disruptions and to identify non-  
672 specific side effects. Successful preclinical studies would be directly translatable to human  
673 studies aimed at suppressing loudness hyperacusis and possibly other sensory hypersensitivity  
674 disorders associated with FX and ASD, as well as other clinical disorders with high prevalence  
675 of hyperacusis such as Williams syndrome and fibromyalgia (Miani et al., 2001; Suhnan et al.,  
676 2017; Zarchi et al., 2015). To this end, we attempted to validate RT-I functions as a tool for  
677 screening drug therapies by determining the effect of mGlu5 inhibitors on RT differences in FX  
678 animals.

679 We found that MTEP, a selective mGluR5 negative allosteric modulator, dose-dependently  
680 normalized RT-I functions in *Fmr1* KO rats (Fig 5). Our results are therefore consistent with  
681 previous studies showing that mGlu5 inhibition reverses other auditory phenotypes, such as  
682 increased propensity for audiogenic seizures and altered acoustic startle response (Yan et al.,  
683 2005). However, the operant behavioral task used in this study also has several key features,

684 such as self-initiated trials and no stimulus catch trials, that allow for monitoring of non-specific  
685 side effects of mGlu5 inhibition. Although MTEP normalized RT-I functions in *Fmr1* KO rats, it  
686 also affected other behavioral metrics in both WT and KO animals. These include a modest  
687 dose-dependent decrease in total trials initiated, suggestive of decreased motivation or appetite,  
688 and a dose-dependent increase in FA rates, suggestive of increased impulsivity or decreased  
689 attention. It is unlikely that MTEP-dependent changes to RT in FX animals were a byproduct of  
690 these changes in task performance, as RT was only affected in *Fmr1* KO rat but not WT  
691 littermates, whereas trial number and FA rate were equally affected in both genotypes (Fig 5).  
692 However, these side effects begin to appear at the same doses where the beneficial effects on  
693 RT are observed, indicating that broad spectrum mGluR5 antagonists may have a very narrow  
694 therapeutic range, limiting their clinical efficacy. These results demonstrate the utility of this task  
695 design in terms of screening pharmacotherapies for auditory phenotypes and identifying  
696 potential side-effects. Future studies can use this paradigm to optimize dosing structure, assess  
697 long-term tolerance development, and examine other potential therapies for FX and ASD.  
698 Importantly, we have shown that RT-I functions remain stable over several months (Radziwon  
699 and Salvi, 2020), suggesting this approach can be used for longitudinal studies.

700 **4.5 Conclusion:** Using RT-I functions to quantify loudness growth, we show for the first time  
701 that male *Fmr1* rats, in comparison to their WT littermates, show robust evidence of loudness  
702 hyperacusis to a variety of acoustic stimuli. Loudness hyperacusis in *Fmr1* KO rats was  
703 accompanied by enhanced spectral integration of loudness and deficient temporal summation of  
704 loudness as suprathreshold intensities. *Fmr1* KO rats had normal hearing thresholds and  
705 exhibited normal temporal integration at the threshold of audibility, perceptual characteristics  
706 compatible with normal cochlear function, but suggestive of central auditory processing deficits  
707 possibly mediated by an imbalance between excitation and inhibition. MTEP, an mGluR5  
708 negative allosteric modulator, dose-dependently restored normal loudness growth in *Fmr1* KO  
709 rats but had no effect on RT-I measures of loudness growth in WT littermates. Behavioral RT-I  
710 measures of loudness growth thus represent a powerful tool for characterizing various  
711 dimensions of aberrant auditory processing in FX and ASD and can be used for preclinical  
712 screening of pharmacotherapies to treat loudness intolerance disorders and identifying potential  
713 side effects. These same psychophysical tests of loudness perception may also prove useful in  
714 the diagnosis or treatment of hyperacusis in FX and ASD individuals.

715 **Acknowledgements:** This research was supported in part by grants from NIH (RS:  
716 R21DC017813; BDA: F32DC015160, K01DC018310), The Simons Foundation for Autism  
717 Research Initiative (RS), and a NARSAD Young Investigator Award (BDA).

## 718 **References**

- 719 Anagnostou, E., 2018. Clinical trials in autism spectrum disorder: evidence, challenges and  
720 future directions. *Curr Opin Neurol.* 31, 119-125.
- 721 Anderson, J. J., et al., 2002. [3H]Methoxymethyl-3-[(2-methyl-1,3-thiazol-4-yl)ethynyl]pyridine  
722 binding to metabotropic glutamate receptor subtype 5 in rodent brain: in vitro and in vivo  
723 characterization. *J Pharmacol Exp Ther.* 303, 1044-51.
- 724 Auerbach, B. D., et al., 2019. Testing the Central Gain Model: Loudness Growth Correlates with  
725 Central Auditory Gain Enhancement in a Rodent Model of Hyperacusis. *Neuroscience.*  
726 407, 93-107.
- 727 Bear, M. F., et al., 2008. Fragile X: translation in action. *Neuropsychopharmacology.* 33, 84-7.
- 728 Bear, M. F., et al., 2004. The mGluR theory of fragile X mental retardation. *Trends Neurosci.* 27,  
729 370-7.
- 730 Berry-Kravis, E., 2014. Mechanism-based treatments in neurodevelopmental disorders: fragile X  
731 syndrome. *Pediatr Neurol.* 50, 297-302.
- 732 Berry-Kravis, E., et al., 2016. Mavoglurant in fragile X syndrome: Results of two randomized,  
733 double-blind, placebo-controlled trials. *Sci Transl Med.* 8, 321ra5.
- 734 Berry-Kravis, E., et al., 2017. Arbaclofen in fragile X syndrome: results of phase 3 trials. *J*  
735 *Neurodev Disord.* 9, 3.
- 736 Berry-Kravis, E. M., et al., 2018. Drug development for neurodevelopmental disorders: lessons  
737 learned from fragile X syndrome. *Nat Rev Drug Discov.* 17, 280-299.
- 738 Bhakar, A. L., et al., 2012. The pathophysiology of fragile X (and what it teaches us about  
739 synapses). *Annu Rev Neurosci.* 35, 417-43.
- 740 Buus, S., et al., 1997. Temporal integration of loudness, loudness discrimination, and the form  
741 of the loudness function. *J Acoust Soc Am.* 101, 669-80.
- 742 Buus, S., et al., 1999. Temporal integration of loudness in listeners with hearing losses of  
743 primarily cochlear origin. *J Acoust Soc Am.* 105, 3464-80.
- 744 Cacace, A. T., Margolis, R. H., 1985. On the loudness of complex stimuli and its relationship to  
745 cochlear excitation. *J Acoust Soc Am.* 78, 1568-73.
- 746 Chromik, L. C., et al., 2019. The Influence of Hyperactivity, Impulsivity, and Attention Problems  
747 on Social Functioning in Adolescents and Young Adults With Fragile X Syndrome. *J*  
748 *Atten Disord.* 23, 181-188.
- 749 Danesh, A. A., et al., 2015. Tinnitus and hyperacusis in autism spectrum disorders with  
750 emphasis on high functioning individuals diagnosed with Asperger's Syndrome. *Int J*  
751 *Pediatr Otorhinolaryngol.* 79, 1683-8.
- 752 de la Torre-Ubieta, L., et al., 2016. Advancing the understanding of autism disease mechanisms  
753 through genetics. *Nat Med.* 22, 345-61.
- 754 Demopoulos, C., Lewine, J. D., 2016. Audiometric Profiles in Autism Spectrum Disorders: Does  
755 Subclinical Hearing Loss Impact Communication? *Autism Res.* 9, 107-20.
- 756 Doan, R. N., et al., 2019. Recessive gene disruptions in autism spectrum disorder. *Nat Genet.*  
757 51, 1092-1098.
- 758 Dolen, G., et al., 2007. Correction of fragile X syndrome in mice. *Neuron.* 56, 955-62.
- 759 Erickson, C. A., et al., 2017. Fragile X targeted pharmacotherapy: lessons learned and future  
760 directions. *J Neurodev Disord.* 9, 7.
- 761 Ethridge, L. E., et al., 2016. Reduced habituation of auditory evoked potentials indicate cortical  
762 hyper-excitability in Fragile X Syndrome. *Transl Psychiatry.* 6, e787.
- 763 Florentine, M., et al., 1998. Temporal integration of loudness under partial masking. *J Acoust*  
764 *Soc Am.* 104, 999-1007.
- 765 Golden, C. E. M., et al., 2019. Deletion of the KH1 Domain of Fmr1 Leads to Transcriptional  
766 Alterations and Attentional Deficits in Rats. *Cereb Cortex.* 29, 2228-2244.

- 767 Gomes, E., et al., 2008. Auditory hypersensitivity in the autistic spectrum disorder. *Pro Fono*.  
768 20, 279-84.
- 769 Green, S., 1975. Auditory sensitivity and equal loudness in the squirrel monkey (*Saimiri*  
770 *sciureus*). *J Exp Anal Behav*. 23, 255-64.
- 771 Hagerman, R. J., et al., 2017. Fragile X syndrome. *Nature Reviews Disease Primers*. 3, 17065.
- 772 Hall, J. W., Fernandes, M. A., 1983. Temporal integration, frequency resolution, and off-  
773 frequency listening in normal-hearing and cochlear-impaired listeners. *J Acoust Soc Am*.  
774 74, 1172-7.
- 775 Hamilton, S. M., et al., 2014. *Fmr1* and *Nlgn3* knockout rats: novel tools for investigating autism  
776 spectrum disorders. *Behav Neurosci*. 128, 103-9.
- 777 Isaacson, J. S., Scanziani, M., 2011. How inhibition shapes cortical activity. *Neuron*. 72, 231-43.
- 778 Khalfa, S., et al., 2004. Increased perception of loudness in autism. *Hear Res*. 198, 87-92.
- 779 Krueger, D. D., Bear, M. F., 2011. Toward fulfilling the promise of molecular medicine in fragile  
780 X syndrome. *Annu Rev Med*. 62, 411-29.
- 781 Lauer, A., Dooling, R., 2007. Evidence of hyperacusis in canaries with permanent hereditary  
782 high-frequency hearing loss. *Sem. Hear*. 28, 319-326.
- 783 Leigh, M. J., et al., 2013. A randomized double-blind, placebo-controlled trial of minocycline in  
784 children and adolescents with fragile x syndrome. *J Dev Behav Pediatr*. 34, 147-55.
- 785 Lovelace, J. W., et al., 2018. Translation-relevant EEG phenotypes in a mouse model of Fragile  
786 X Syndrome. *Neurobiol Dis*. 115, 39-48.
- 787 Marshall, L., Brandt, J. F., 1980. The relationship between loudness and reaction time in normal  
788 hearing listeners. *Acta Otolaryngol*. 90, 244-9.
- 789 May, B. J., et al., 2009. Loudness perception in the domestic cat: reaction time estimates of  
790 equal loudness contours and recruitment effects. *J Assoc Res Otolaryngol*. 10, 295-308.
- 791 McCamphill, P. K., et al., 2020. Selective inhibition of glycogen synthase kinase 3alpha corrects  
792 pathophysiology in a mouse model of fragile X syndrome. *Sci Transl Med*. 12.
- 793 McCullagh, E. A., et al., 2020. Mechanisms underlying auditory processing deficits in Fragile X  
794 syndrome. *FASEB J*. 34, 3501-3518.
- 795 Melara, R. D., Marks, L. E., 1990. Interaction among auditory dimensions: timbre, pitch, and  
796 loudness. *Percept Psychophys*. 48, 169-78.
- 797 Miani, C., et al., 2001. Treatment of hyperacusis in Williams syndrome with bilateral conductive  
798 hearing loss. *Eur Arch Otorhinolaryngol*. 258, 341-4.
- 799 Michalon, A., et al., 2012. Chronic pharmacological mGlu5 inhibition corrects fragile X in adult  
800 mice. *Neuron*. 74, 49-56.
- 801 Moody, D. B., 1973. Behavioral studies of noise-induced hearing loss in primates: loudness  
802 recruitment. *Adv Otorhinolaryngol*. 20, 82-101.
- 803 Moy, S. S., Nadler, J. J., 2008. Advances in behavioral genetics: mouse models of autism. *Mol*  
804 *Psychiatry*. 13, 4-26.
- 805 Nickols, H. H., Conn, P. J., 2014. Development of allosteric modulators of GPCRs for treatment  
806 of CNS disorders. *Neurobiol Dis*. 61, 55-71.
- 807 Pedersen, C. B., Poulsen, T., 1973. Loudness of brief tones in hearing-impaired ears. Temporal  
808 integration of acoustic energy at suprathreshold levels in patients with presbycusis.  
809 *Acta Otolaryngol (Stockh)*. 76, 402-9.
- 810 Pedersen, C. B., Salomon, G., 1977. Temporal integration of acoustic energy. *Acta Otolaryngol*.  
811 83, 417-23.
- 812 Pilc, A., et al., 2002. Multiple MPEP administrations evoke anxiolytic- and antidepressant-like  
813 effects in rats. *Neuropharmacology*. 43, 181-7.
- 814 Plack, C. J., Skeels, V., 2007. Temporal integration and compression near absolute threshold in  
815 normal and impaired ears. *J Acoust Soc Am*. 122, 2236-44.



- 816 Pop, A. S., et al., 2014. Fragile X syndrome: a preclinical review on metabotropic glutamate  
817 receptor 5 (mGluR5) antagonists and drug development. *Psychopharmacology (Berl)*.  
818 231, 1217-26.
- 819 Radziwon, K., et al., 2019. Noise-Induced loudness recruitment and hyperacusis: Insufficient  
820 central gain in auditory cortex and amygdala. *Neuroscience*. 422, 212-227.
- 821 Radziwon, K., et al., 2017. Salicylate-induced hyperacusis in rats: Dose- and frequency-  
822 dependent effects. *Hear Res*. 350, 133-138.
- 823 Radziwon, K., Salvi, R., 2020. Using auditory reaction time to measure loudness growth in rats.  
824 *Hear Res*. 395, 108026.
- 825 Radziwon, K. E., et al., 2009. Behaviorally measured audiograms and gap detection thresholds  
826 in CBA/CaJ mice. *J Comp Physiol A Neuroethol Sens Neural Behav Physiol*. 195, 961-9.
- 827 Reiss, A. L., Hall, S. S., 2007. Fragile X syndrome: assessment and treatment implications.  
828 *Child Adolesc Psychiatr Clin N Am*. 16, 663-75.
- 829 Rosenhall, U., et al., 1999. Autism and hearing loss. *J Autism Dev Disord*. 29, 349-57.
- 830 Rotschafer, S. E., Razak, K. A., 2014. Auditory processing in fragile x syndrome. *Front Cell*  
831 *Neurosci*. 8, 19.
- 832 Scharf, B., 1978. Comparison of normal and impaired hearing. II. Frequency analysis, speech  
833 perception. *Scand Audiol Suppl*. 81-106.
- 834 Scharf, B., Meiselman, C. H., Critical bandwidth at high intensities. In: E. F. Evans, J. P. Wilson,  
835 (Eds.), *Psychophysics and physiology of hearing*. Academic Press, London, 1977, pp.  
836 221-32.
- 837 Schlittenlacher, J., et al., 2014. Binaural loudness gain measured by simple reaction time. *Atten*  
838 *Percept Psychophys*. 76, 1465-72.
- 839 Schmitt, L. M., et al., 2019. Executive Function in Fragile X Syndrome: A Systematic Review.  
840 *Brain Sci*. 9.
- 841 Schroeder, J. C., et al., 2017. Genetic Animal Models for Autism Spectrum Disorder. *Curr Top*  
842 *Behav Neurosci*. 30, 311-324.
- 843 Seitz, P. F., Rakerd, B., 1997. Auditory stimulus intensity and reaction time in listeners with  
844 longstanding sensorineural hearing loss. *Ear Hear*. 18, 502-12.
- 845 Sinclair, D., et al., 2017. Sensory processing in autism spectrum disorders and Fragile X  
846 syndrome-From the clinic to animal models. *Neurosci Biobehav Rev*. 76, 235-253.
- 847 Spoooren, W. P., et al., 2000. Anxiolytic-like effects of the prototypical metabotropic glutamate  
848 receptor 5 antagonist 2-methyl-6-(phenylethynyl)pyridine in rodents. *J Pharmacol Exp*  
849 *Ther*. 295, 1267-75.
- 850 Stebbins, W. C., 1966. Auditory reaction time and the derivation of equal loudness contours for  
851 the monkey. *J Exp Anal Behav*. 9, 135-42.
- 852 Steckler, T., 2001. Using signal detection methods for analysis of operant performance in mice.  
853 *Behav Brain Res*. 125, 237-48.
- 854 Steigner, J., Ruhlin, S. U., 2014. Systematic Desensitization of Hyperacusis and Vocal Pitch  
855 Disorder Treatment in a Patient with Autism. *Int J Appl Health Sci Pract*. 12.
- 856 Stoppel, L. J., et al., 2017. beta-Arrestin2 Couples Metabotropic Glutamate Receptor 5 to  
857 Neuronal Protein Synthesis and Is a Potential Target to Treat Fragile X. *Cell Rep*. 18,  
858 2807-2814.
- 859 Suhnan, A. P., et al., 2017. Hyperacusis in chronic pain: neural interactions between the  
860 auditory and nociceptive systems. *Int J Audiol*. 56, 801-809.
- 861 Till, S. M., et al., 2015. Conserved hippocampal cellular pathophysiology but distinct behavioural  
862 deficits in a new rat model of FXS. *Hum Mol Genet*. 24, 5977-84.
- 863 Tyler, R. S., et al., 2014. A review of hyperacusis and future directions: part I. Definitions and  
864 manifestations. *Am J Audiol*. 23, 402-19.
- 865 Varty, G. B., et al., 2005. The antinociceptive and anxiolytic-like effects of the metabotropic  
866 glutamate receptor 5 (mGluR5) antagonists, MPEP and MTEP, and the mGluR1

867 antagonist, LY456236, in rodents: a comparison of efficacy and side-effect profiles.  
868 Psychopharmacology (Berl). 179, 207-17.  
869 Verkerk, A. J., et al., 1991. Identification of a gene (FMR-1) containing a CGG repeat coincident  
870 with a breakpoint cluster region exhibiting length variation in fragile X syndrome. Cell.  
871 65, 905-14.  
872 Vorstman, J. A. S., et al., 2017. Autism genetics: opportunities and challenges for clinical  
873 translation. Nat Rev Genet. 18, 362-376.  
874 Wagner, E., et al., 2004. Spectral loudness summation and simple reaction time. J Acoust Soc  
875 Am. 116, 1681-6.  
876 Wehr, M., Zador, A. M., 2003. Balanced inhibition underlies tuning and sharpens spike timing in  
877 auditory cortex. Nature. 426, 442-6.  
878 Williams, Z. J., et al., 2021a. A review of decreased sound tolerance in autism: Definitions,  
879 phenomenology, and potential mechanisms. Neurosci Biobehav Rev. 121, 1-17.  
880 Williams, Z. J., et al., 2021b. Prevalence of Decreased Sound Tolerance (Hyperacusis) in  
881 Individuals With Autism Spectrum Disorder: A Meta-Analysis. Ear Hear.  
882 Yan, Q. J., et al., 2005. Suppression of two major Fragile X Syndrome mouse model  
883 phenotypes by the mGluR5 antagonist MPEP. Neuropharmacology. 49, 1053-66.  
884 Yost, W. A., Shofner, W. P., 2009. Critical bands and critical ratios in animal psychoacoustics:  
885 an example using chinchilla data. J Acoust Soc Am. 125, 315-23.  
886 Zarchi, O., et al., 2015. Hyperactive auditory processing in Williams syndrome: Evidence from  
887 auditory evoked potentials. Psychophysiology. 52, 782-9.  
888 Zwicker, A., et al., 1957. Critical bandwidth in loudness summation. J Acoust Soc Am. 29, 548-  
889 557.  
890 Zwislocki, J. J., 1969. Temporal summation of loudness: an analysis. J Acoust Soc Am. 46, 431-  
891 41.

892

893

894

895
